# Supplementary material
Source: PubMed Central journal article supplement (PMC4649218)
Supplement: AAC.01278-15_zac012154629so1.pdf [file AAC.01278-15_zac012154629so1.pdf]

## Supplementary Information

**Table S1.** Primers used in this study.

| Primer  | Sequence (5'-3')         |
|---------|--------------------------|
| IL8-F   | AGAGACAGCAGAGCACAC       |
| IL8-R   | AGTTCTTTAGCACTCCTTGG     |
| AREG-F  | TCCACTCGCTCTTCCAACAC     |
| AREG-R  | ATGGTTCACGCTTCCCAGAG     |
| CXCL1-F | GCAGGGAATTCACCCAAGA      |
| CXCL1-R | CTTCAGGAACAGCCACCAGT     |
| DUSP1-F | ACAAGGCAGACATCAGCTCC     |
| DUSP1-R | TCGCCTCTGCTTCACAACT      |
| EGFR-F  | GTGTGATCCAAGCTGTCCA      |
| EGFR-R  | CTGTATTTGCCCTCGGGGT      |
| TLR2-F  | GTACCTGTGGGGCTCATTGT     |
| TLR2-R  | CAAGACCCACACCATCCACA     |
| SIRT1-F | TCGCCTTGCTGTAGACTTCC     |
| SIRT1-R | TTTGGATTCCCACAACCTGT     |
| GAPDH-F | GAAGGTGAAGGTCGGAGTC      |
| GAPDH-R | (5'-GAAGATGGTGATGGGATTTC |

**Table S2.** siRNAs used in this study.

| Gene  | siRNA reference  | Sequence (5'-3')      |
|-------|------------------|-----------------------|
| EGFR  | SI02660140 (a)   | TACGAATATTAACACTTCAA  |
|       | SI02660147 (b)   | ATAGGTATTGGTGAATTTAAA |
| TLR2  | SI00050015 (a)   | CTGGGCAGTCTTGAACATTTA |
|       | SI00050022 (b)   | CAGGTAAAGTGGAAACGTTAA |
| SIRT1 | SI00098434 (a)   | CAAGCGATGTTTGATATTGAA |
|       | SI00098441 (b)   | CAGGATTATTGTATTTACGTT |
|       | Control AllStars | UUCUUCGAACGUGUCACG    |

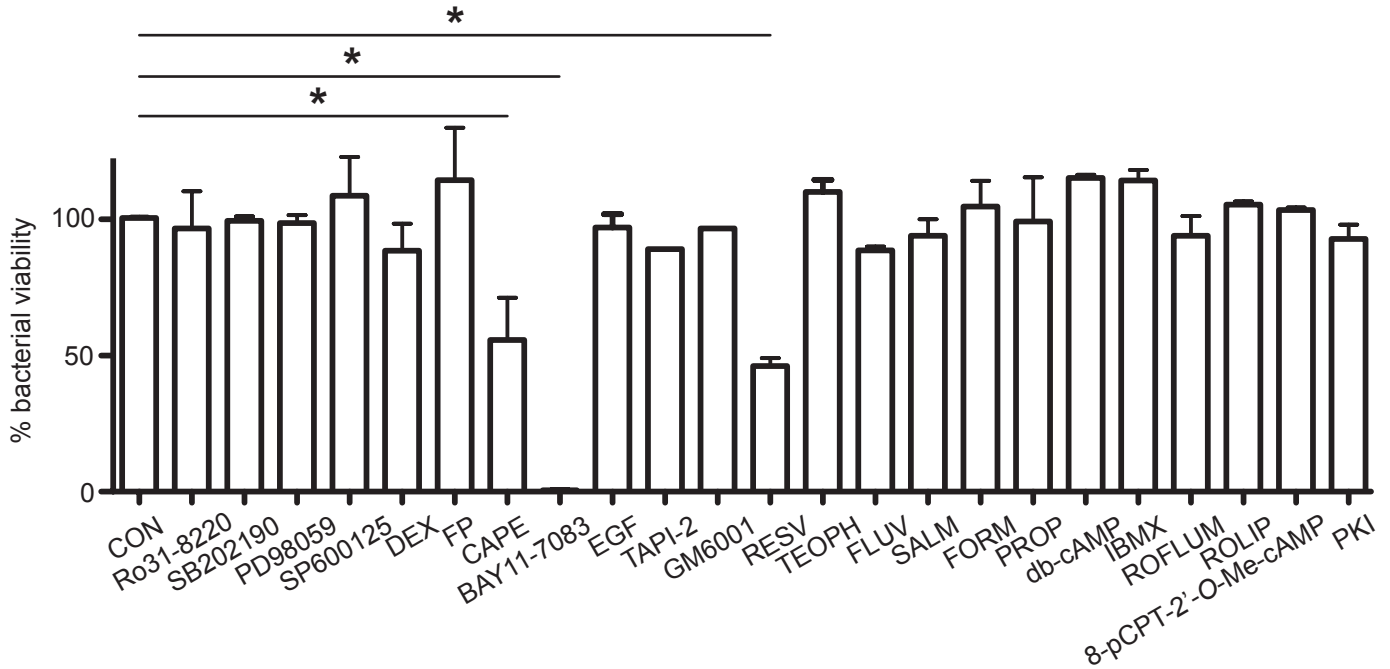

**Figure S1.** Effect of a panel of molecules on NTHi viability. Bacteria were collected from a freshly grown chocolate agar plate with 1 ml PBS, and adjusted to OD<sub>600</sub>=1; 100  $\mu$ l of this suspension ( $\sim$ 10<sup>8</sup> c.f.u.) were incubated in 1 ml EBSS medium for 2 h in the presence of Ro31-8220 1  $\mu$ M, SB202190 30  $\mu$ M, PD98059 50  $\mu$ M, SP600125 50  $\mu$ M, DEX 1  $\mu$ M, FP 1  $\mu$ M, CAPE 52.8  $\mu$ M, BAY11-7093 5  $\mu$ M, EGF 167 nM, TAPI-2 100  $\mu$ M, GM6001 200  $\mu$ M, RESV 20  $\mu$ M, TEOPH 20  $\mu$ M, FLUV 200  $\mu$ M, SALM 1  $\mu$ M, FORM 10  $\mu$ M, PROP 20  $\mu$ M, db-cAMP 1 mM, IBMX 1mM, ROFLUM 1  $\mu$ M, ROLIP 10  $\mu$ M, 8-pCPT-2'-O-Me-cAMP 100  $\mu$ M, PKI 1  $\mu$ M, or vehicle solution (control non-treated, CON). Bacterial viability was assessed by serial dilution and plating. Data are shown as per cent viability compared with CON non-treated bacteria considered to be 100%, given that vehicle solutions used in this study did not alter bacterial viability (data not shown). Data are the means of three independent experiments performed at least in triplicate. \*p<0.05 compared to bacterial viability in the absence of treatment. CAPE, BAY11-7083 and resveratrol displayed a bactericidal effect.

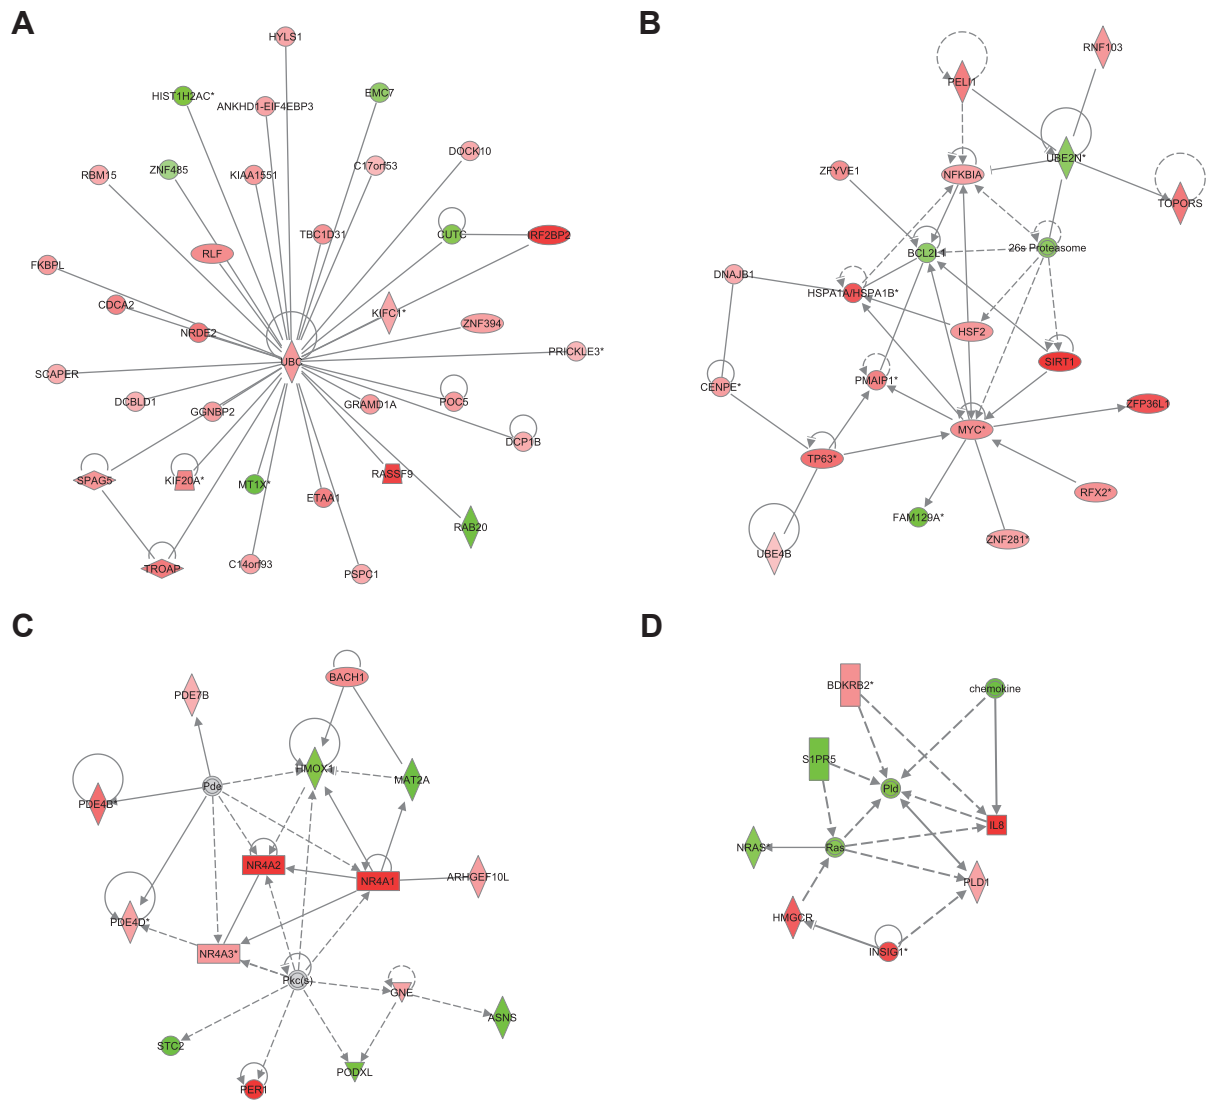

**Figure S2.** Networks of interactions between the selected genes obtained using IPA. (A) Network 1 (best scored network). (B) Network 3. (C) Network 8. (D) Network 21.

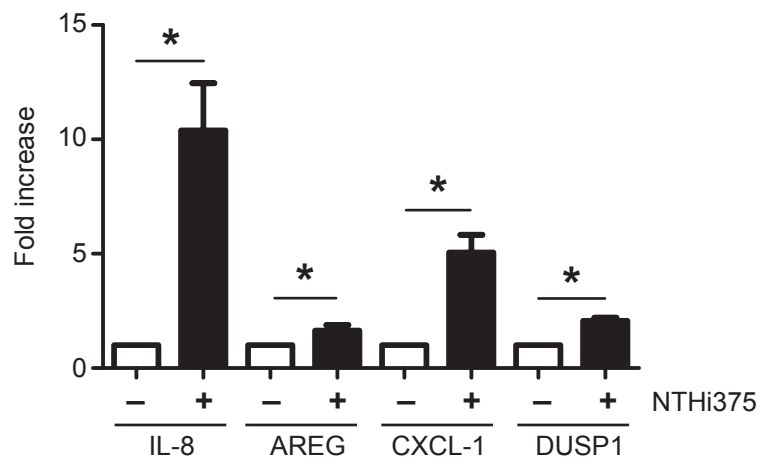

**Figure S3.** Relative comparison between gene expression in NTHi375-infected and control (CON) uninfected A549 cells. IL-8, AREG, CXCL-1 and DUSP1 mRNA levels, assessed by RT-qPCR in A549 control cells (CON) or cells infected with NTHi375 for 2 h (data are mean±SD; n=9). IL-8, AREG, CXCL-1 and DUSP1 mRNA levels were higher in NTHi375 infected- than in uninfected cells (IL-8,  $p < 0.05$ ; AREG,  $p < 0.05$ ; CXCL-1,  $p < 0.001$ ; DUSP1  $p < 0.05$ ). Data are shown as gene expression in infected- compared to control uninfected cells.

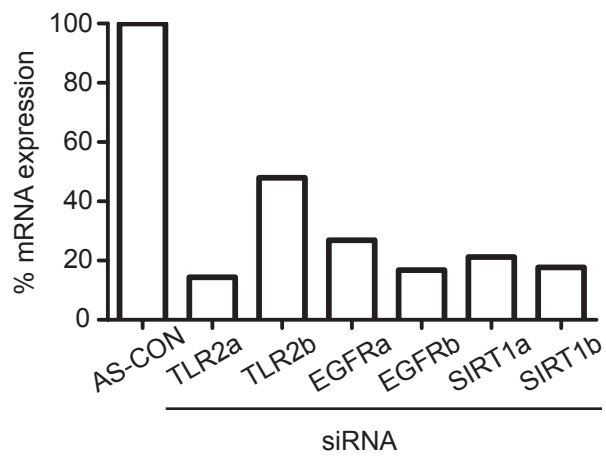

**Figure S4.** Validation of siRNA-mediated knockdown of TLR2, EGFR and SIRT1. TLR2, EGFR and SIRT1 mRNA levels were measured by RT-qPCR on control (AS-CON) and siRNA treated cells. In all cases, a reduction of ~50-80% was observed in siRNA-treated compared to control (AS-CON) cells.

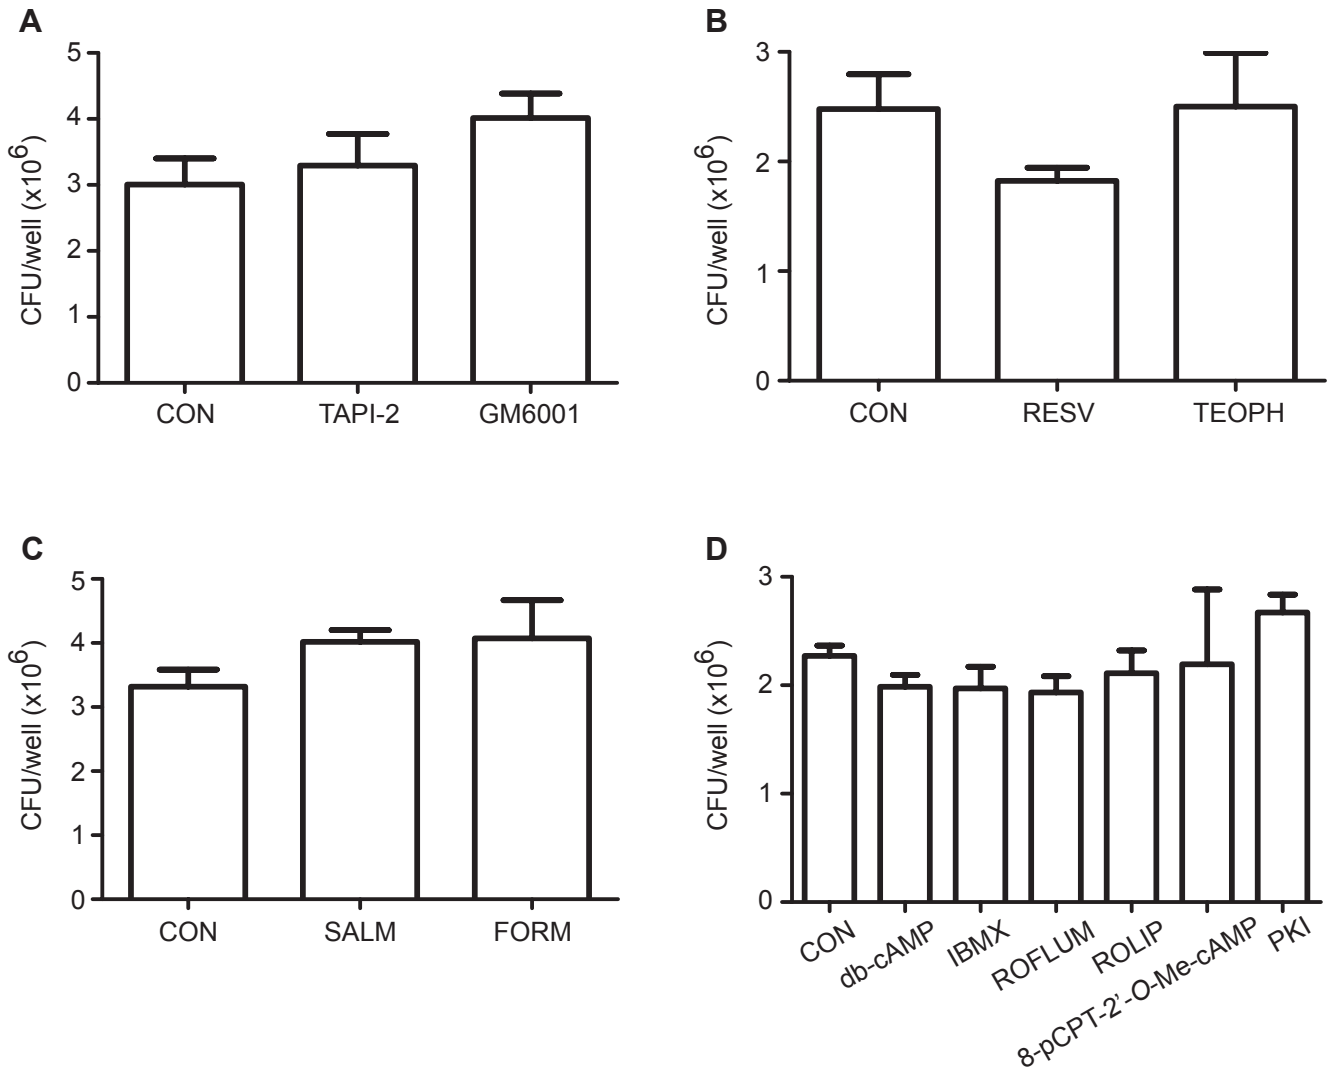

**Figure S5.** Effect of a panel of host-directed drugs on NTHi375 adhesion to A549 epithelial cells. Effect of cell treatment with TAPI-2 100  $\mu$ M and GM6001 200  $\mu$ M (A); RESV 20  $\mu$ M and TEOPH 20  $\mu$ M (B); SALM 1  $\mu$ M and FORM 10  $\mu$ M (C); db-cAMP 1 mM, IBMX 1mM, ROFLUM 1  $\mu$ M, ROLIP 10  $\mu$ M, 8-pCPT-2'-O-Me-cAMP 100  $\mu$ M and PKI 1  $\mu$ M (D) on NTHi375 adhesion to A549 cells. In all cases, comparable NTHi375 adhesion to treated- and control (CON) untreated cells was observed.
